# Supplementary material for: Efficient extraction of bioactive flavonoids from Celtis sinensis leaves using deep eutectic solvent as green media
Source: Royal Society of Chemistry journal article supplement (doi:10.1039/d1ra01848e), 2021-01-01
Supplement: d1ra01848e1.pdf [file d1ra01848e1.pdf]

## Supplementary Material

Efficient extraction of bioactive flavonoids from *Celtis sinensis* leaves  
using deep eutectic solvent as green media

Lei Wang<sup>a,c,1</sup>, Xianying Fang<sup>a,c,1</sup>, Yang Hu<sup>a</sup>, Yiwei Zhang<sup>a</sup>, Zhipeng Qi<sup>a</sup>, Jie Li<sup>a</sup>,  
Linguo Zhao<sup>a,b,c\*</sup>

<sup>a</sup> *College of Chemical Engineering, Nanjing Forestry University, Nanjing 210037,  
China;*

<sup>b</sup> *Co-Innovation Center for Sustainable Forestry in Southern China, Nanjing Forestry  
University, Nanjing 210037, China;*

<sup>c</sup> *Jiangsu Co-Innovation Center of Efficient Processing and Utilization of Forest  
Resources, Nanjing Forestry University, Nanjing 210037, China.*

<sup>1</sup> *These authors contributed equally to this work*

**\*Corresponding author:** Linguo Zhao \*

Tel.: +86-25-85427396

*E-mail address:* njfu2304@163.com

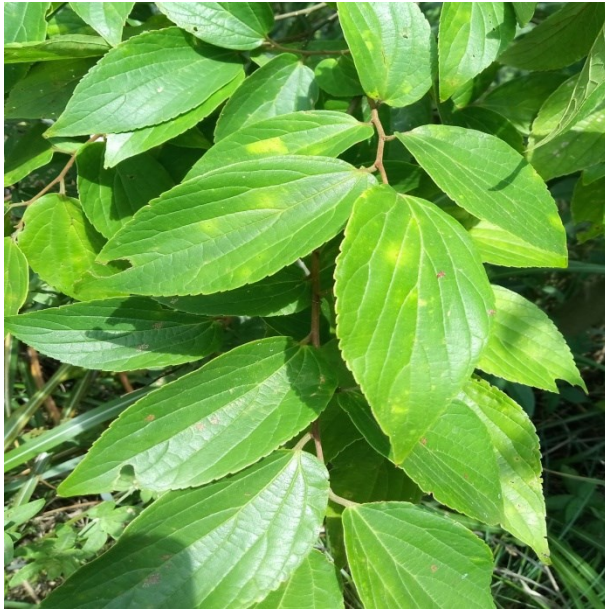

Fig. S1 Schematic representation of *Celtis sinensis* leaves.

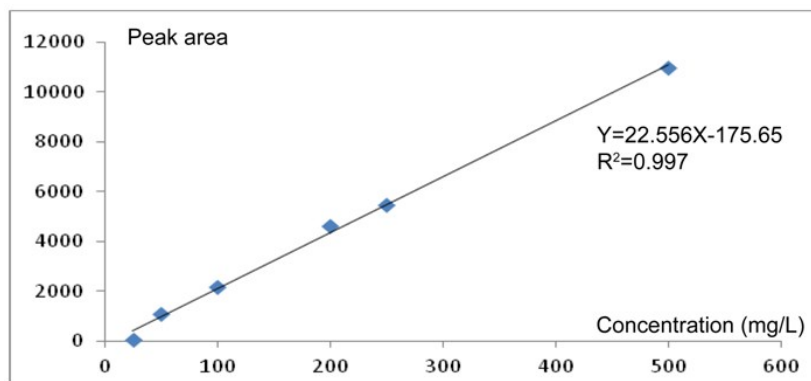

Fig. S2 Content of isovitexin was calculated by a calibration curve established with the regression equation by HPLC. (X is concentration (mg/L) of isovitexin, Y is the peak area of isovitexin)

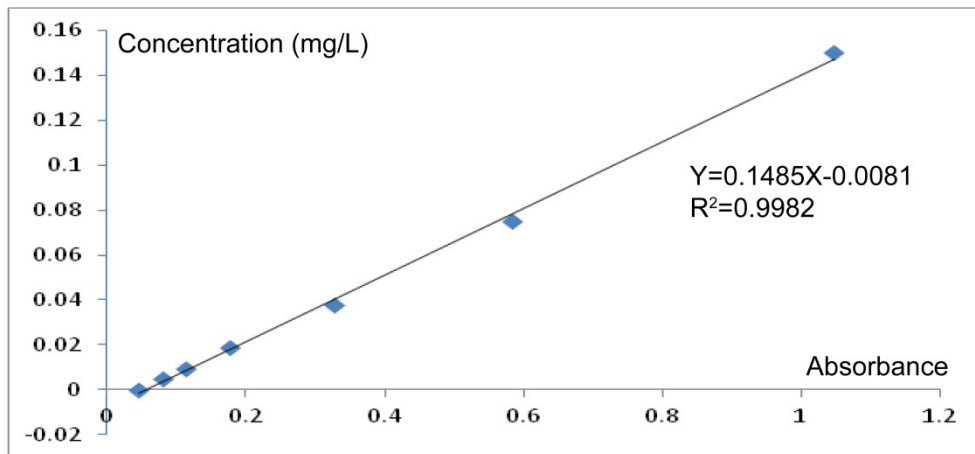

Fig. S3 Rutin was used as the standard substance to establish curve to measure total flavonoids. (X is absorbance of rutin, Y is the concentration (mg/mL) of rutin)

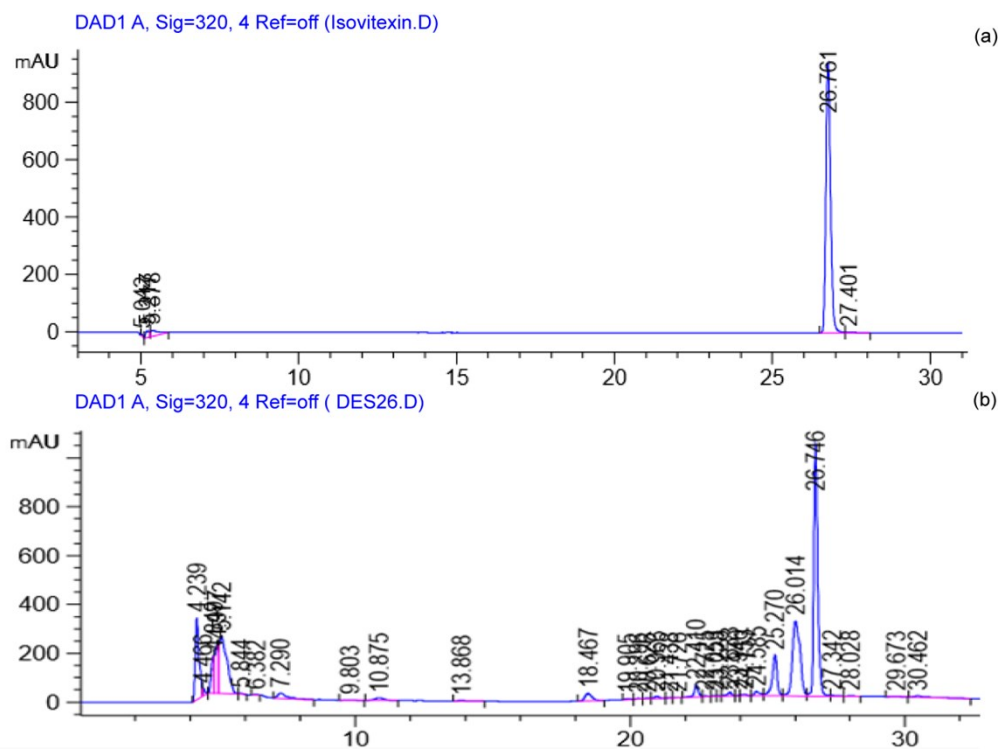

Fig. S4 HPLC-chromatogram for analysis of isovitexin extracted from *Celtis sinensis*.

(a) HPLC-chromatogram for analysis of isovitexin. (b) HPLC-chromatogram of DES26 extract.
